# Supplementary material for: Reduced Body Fat and Epididymal Adipose Apelin Expression Associated With Raspberry Ketone [4-(4-Hydroxyphenyl)-2-Butanone] Weight Gain Prevention in High-Fat-Diet Fed Mice
Source: Front Physiol. 2021 Nov 23;12:771816. doi: 10.3389/fphys.2021.771816 (PMC8650585; doi:10.3389/fphys.2021.771816)
Supplement: Supplementary file 1 [file Data_Sheet_1.docx]

Supplementary Figure: Experimental design for 12‐week treatment with raspberry ketone in C57BL6 mice.

| Supplementary Table. Completed blood cell counts for mice with raspberry ketone or vehicle daily dosing for a period of 12 weeks | | | | |
| --- | --- | --- | --- | --- |
|  | LFD_Veh | HFD_Veh | HFD_RKw4 | HFD_RK |
| | WBC,103/μL | | --- | | NEU, 103/μL | | LYM, 103/μL | | MONO, 103/μL | | EOS, 103/μL | | BAS, 103/μL | | NEU % | | LYM % | | MONO % | | EOS % | | BAS % | | RBC, 106/μL | | HGB, g/dL | | HCT% | | MCV, fL | | MCH, pg | | MCHC, g/dL | | RDW % | | PLT, 103/μL | | MPV, fL | | | 1.07 ± 0.16 | | --- | | 0.38 ± 0.06 | | 0.55 ± 0.08 | | 0.066 ± 0.01 | | 0.04 ± 0.01 | | 0.033 ± 0.01 | | 34.99 ± 1.24 | | 50.94 ± 2.24 | | 6.83 ± 1.29 | | 4.01 ± 0.82 | | 3.23 ± 0.57 | | 9.39 ± 0.24 | | 15.44 ± 0.34 | | 46.31 ± 1.02 | | 49.34 ± 0.31 | | 16.44 ± 0.13 | | 33.33 ± 0.20 | | 14.19 ± 0.30 | | 1004.86 ± 58.52 | | 5.2 ± 0.07 | | | 0.99 ± 0.15 | | --- | | 0.29 ± 0.08 | | 0.57 ± 0.06 | | 0.03 ± 0.01 | | 0.051 ± 0.02 | | 0.04 ± 0.02 | | 26.39 ± 3.25 | | 62.73 ± 5.33 | | 3.49 ± 0.79 | | 4.70 ± 1.33 | | 2.70 ± 1.49 | | 9.19 ± 0.65 | | 15.28 ± 0.91 | | 44.53 ± 3.12 | | 48.48 ± 0.36 | | 16.80 ± 0.35 | | 34.64 ± 0.65 | | 14.10 ± 0.15 | | 763.63 ±108.78 | | 5.18 ± 0.11 | | | 0.79 ± 0.09 | | --- | | 0.37 ± 0.09 | | 0.36 ± 0.04* | | 0.04 ± 0.01 | | 0.01 ± 0.01 | | 0.02 ± 0.01 | | 42.70 ± 5.33& | | 47.11 ± 5.39 | | 4.60 ± 0.63 | | 2.26 ± 0.49 | | 3.33 ± 0.76 | | 9.73 ± 0.15 | | 15.53 ± 0.18 | | 46.88 ± 0.69 | | 48.19 ± 0.31 | | 15.97 ± 0.13 | | 33.14 ± 0.27 | | 14.25 ± 0.08 | | 1040.88 ± 29.45 | | 4.99 ± 0.07 | | | 0.72 ± 0.16 | | --- | | 0.29 ± 0.07 | | 0.33 ± 0.06*& | | 0.03 ± 0.01 | | 0.03 ± 0.02 | | 0.05 ± 0.02 | | 37.29 ± 3.43 | | 49.14 ± 4.21 | | 4.60 ± 0.93 | | 3.85 ± 0.96 | | 5.13 ± 1.40 | | 8.73 ± 0.40 | | 14.16 ± 0.61 | | 42.55 ± 1.86 | | 48.79 ± 0.30 | | 16.24 ± 0.08 | | 33.30 ± 0.20 | | 13.65 ± 0.13 | | 841.00 ±120.83 | | 5.20 ± 0.09 | |
| raspberry ketone (RK); vehicle (Veh); high fat diet (HFD); low fat diet (LFD); white blood cell count (WBC); neutrophils (NEU); lymphocytes (LYM); monocytes (Mono); eosinophils (EOS); red blood cell count (RBC); hemoglobin concentration (HGB); hematocrit (HCT); mean corpuscular volume (MCV); mean corpuscular hemoglobin (MCH); mean corpuscular hemoglobin concentration (MCHC); red blood cell count distribution width coefficient of variation (RDW); platelet count (PLT); mean platelet volume (MPV). Data are represented as means ± SEM. *p<0.05 vs LFD_Veh, & p < 0.05 vs. HFD_Veh; One way ANOVA followed by Newman Keuls post hoc testing. | | | | |
